# Supplementary material for: Citric Acid Confers Broad Antibiotic Tolerance through Alteration of Bacterial Metabolism and Oxidative Stress
Source: MDPI journal article supplement (doi:10.3390/ijms24109089), 2023-05-22
Supplement: s1 [file s1]

**Supplementary Materials:**

**Table S1. MIC analysis of citric acid against five representative strains.**

| Pathogens                   | MIC (µg/mL) |
|-----------------------------|-------------|
| <i>E. coli</i> ATCC 25922   | >512        |
| <i>E. coli</i> B2           | >512        |
| <i>E. coli</i> O157:H7      | >512        |
| <i>S. aureus</i> ATCC 29213 | >512        |
| MRSA T144                   | >512        |

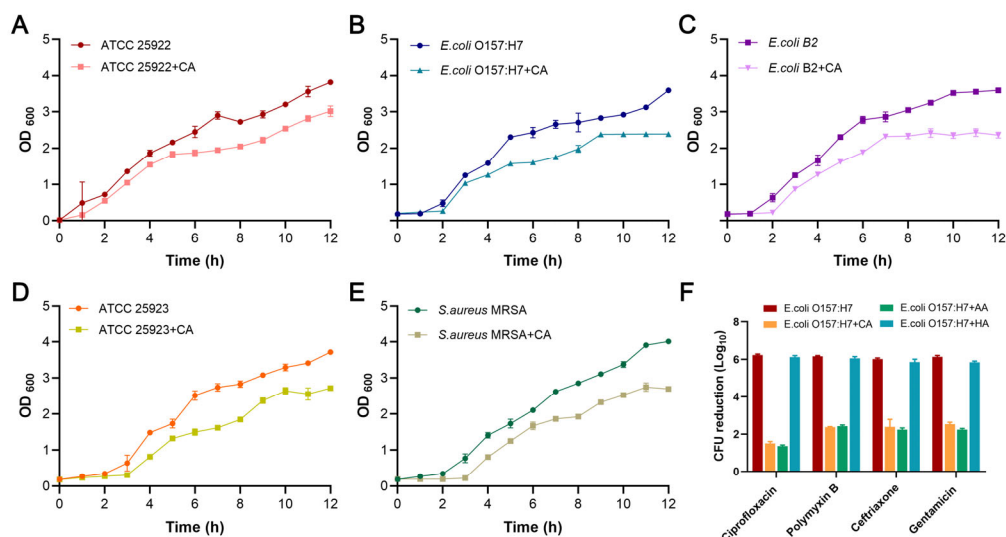

**Figure S1 Growth curves of five representative strains grown in the presence of citric acid (final concentration 2%) for 12 hours.** The optical density (OD<sub>600</sub>) of citric acid and (A) *E. coli* ATCC 25922, (B) *E. coli* O157:H7, (C) *E. coli* B2, (D) *S. aureus* ATCC 25923, (E) MRSA T144 were monitored within 12 hours. (F) : Effect of adding different acidifiers on bactericidal activity of bactericidal antibiotics. CA: Citric acid, AA: Acetic acid, HA: Hydrochloric acid. After adding three acidifiers, the pH of the culture medium is about 2.2. Three biological replicates were used for the experiment.

**Table S2 Co-culture of five representative strains with citric acid had no effect on MIC value of drugs**

| Antibiotic | Targets           | $\mu\text{g/mL}$ |                  |                  |                  |                  |                  |                  |                  |                  |                  |
|------------|-------------------|------------------|------------------|------------------|------------------|------------------|------------------|------------------|------------------|------------------|------------------|
|            |                   | <i>E. coli</i>   |                  | <i>E. coli</i>   |                  | <i>E. coli</i>   |                  | <i>S. aureus</i> |                  | MRSA             |                  |
|            |                   | ATCC 25922       |                  | O157:H7          |                  | B2               |                  | ATCC 29213       |                  | T144             |                  |
|            |                   | MIC <sup>a</sup> | MIC <sup>b</sup> |
| CIP        | DNA synthesis     | 0.03             | 0.03             | <0.03            | <0.03            | 32               | 32               | 0.5              | 0.5              | 8                | 16               |
| CRO        | Cell wall         | 0.03             | 0.03             | <0.03            | <0.03            | 256              | 256              | 4                | 4                | >512             | >512             |
| PB         | Cell membrane     | 0.5              | 1                | 0.5              | 0.5              | 2                | 2                | -                | -                | -                | -                |
| GEN        | Protein synthesis | 0.5              | 0.5              | 0.5              | 0.5              | 64               | 64               | 0.5              | 0.5              | 128              | 128              |
| KAN        | Protein synthesis | 2                | 2                | 2                | 2                | 512              | 512              | 2                | 2                | 512              | 512              |
| TIG        | Protein synthesis | 0.125            | 0.125            | 0.03             | 0.03             | 0.5              | 0.5              | 0.125            | 0.125            | 0.125            | 0.125            |
| VAN        | Cell wall         | -                | -                | -                | -                | -                | -                | 0.5              | 1                | 0.5              | 0.5              |

<sup>a</sup> Initial MIC of representative strains against antibiotics;

<sup>b</sup> MIC of representative strains after co-culturing with citric acid (final concentration 2%) for 6 h.

Abbreviations: CIP, Ciprofloxacin; CRO, Ceftriaxone; PB, Polymyxin B; GEN, Gentamicin; KAN, Kanamycin; TIG, Tigecycline; VAN, Vancomycin.

**Table S3 MIC analysis of five antibiotics before and after citric acid induced antibiotic tolerance in *E.coli* B2.**

| Antibiotic    | MIC (µg/mL) <sup>a</sup> | MIC (µg/mL) <sup>b</sup> |
|---------------|--------------------------|--------------------------|
| Ceftriaxone   | 256                      | 256                      |
| Ciprofloxacin | 32                       | 32                       |
| Polymyxin B   | 2                        | 2                        |
| Gentamicin    | 64                       | 64                       |
| Kanamycin     | 512                      | 512                      |

<sup>a</sup> Initial MIC of *E.coli* B2 against antibiotics;

<sup>b</sup> MIC of CA-*E. coli* B2 induced by citric acid.

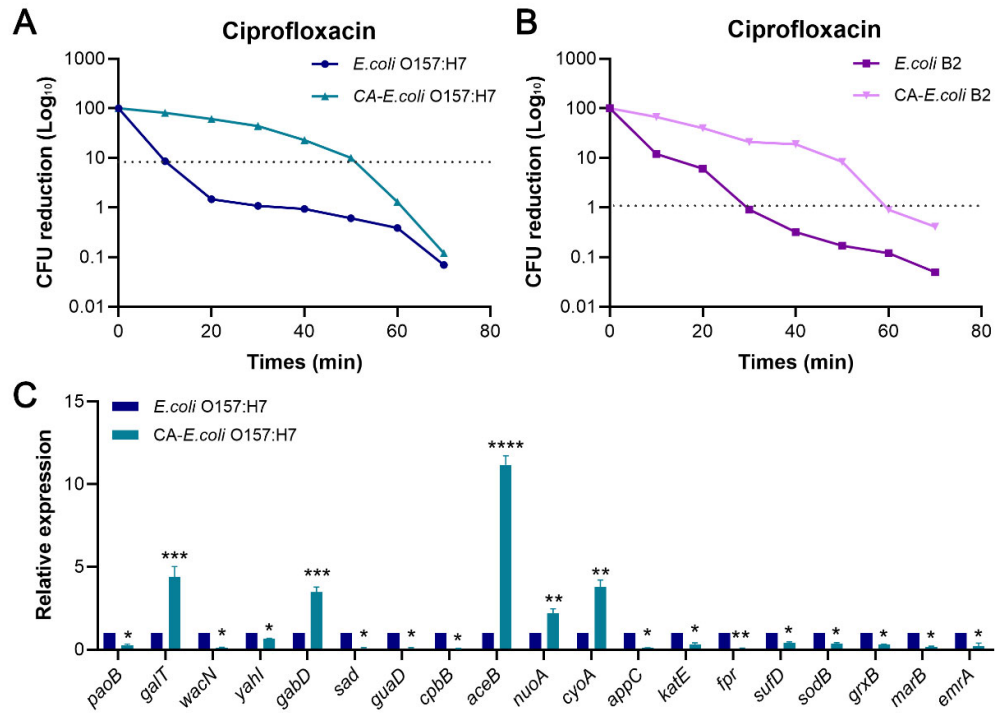

**Figure S2: Growth status and mRNA expression of antibiotic tolerance strains induced by citric acid.** (A and B): Determination of the growth rate of *E. coli* and CA-*E. coli* strains after stable inheritance of citric acid-induced antibiotic tolerance. Observe the absorbance value at OD<sub>600</sub> nm of different strains within 12 hours. Three biological replicates are used. (C): The transcriptome sequencing results of the strains before and after citric acid induction were verified by RT-qPCR. All data are presented as mean  $\pm$  SD and the significances determined by unpaired t test. All data from biological experiments performed in triplicate are presented as means  $\pm$  SD. \* $P < 0.05$ , \*\* $P < 0.01$ , \*\*\* $P < 0.001$ , \*\*\*\* $P < 0.0001$ .

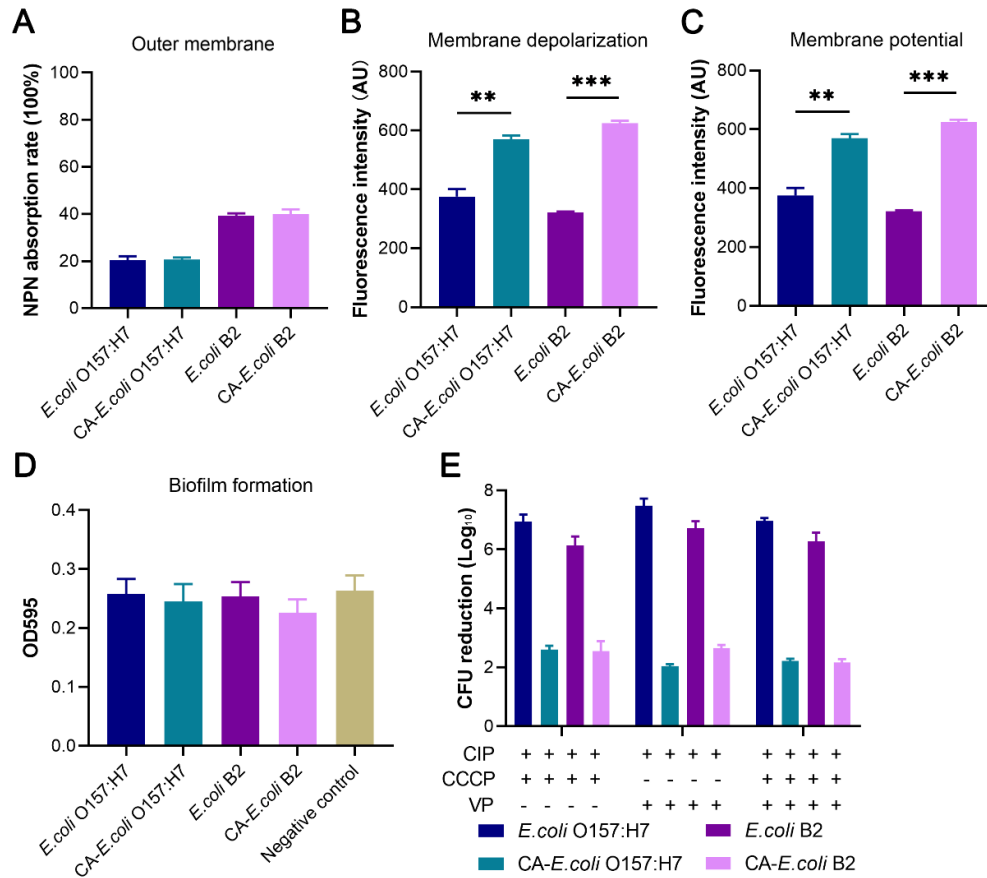

**Figure S3: Effects of citric acid-induced antibiotic tolerance on outer membrane integrity, membrane permeability, membrane potential changes and biofilm formation of *E. coli* strain.** (A and D): The outer membrane integrity and biofilm formation of the CA-*E. coli* strain did not change compared to the *E. coli* strain. (B and C): However, in the CA-*E. coli* strain, membrane depolarization and membrane potential dissipation occurred. (E): CCCP (efflux pump inhibitor, 100  $\mu$ M) and VP (calcium channel inhibitor, 100  $\mu$ M) alone or in combination did not affect the bactericidal activity of ciprofloxacin against CA-*E. coli*. All data from biological experiments performed in triplicate are presented as means  $\pm$  SD. \*\* $P < 0.01$ , \*\*\* $P < 0.001$ .

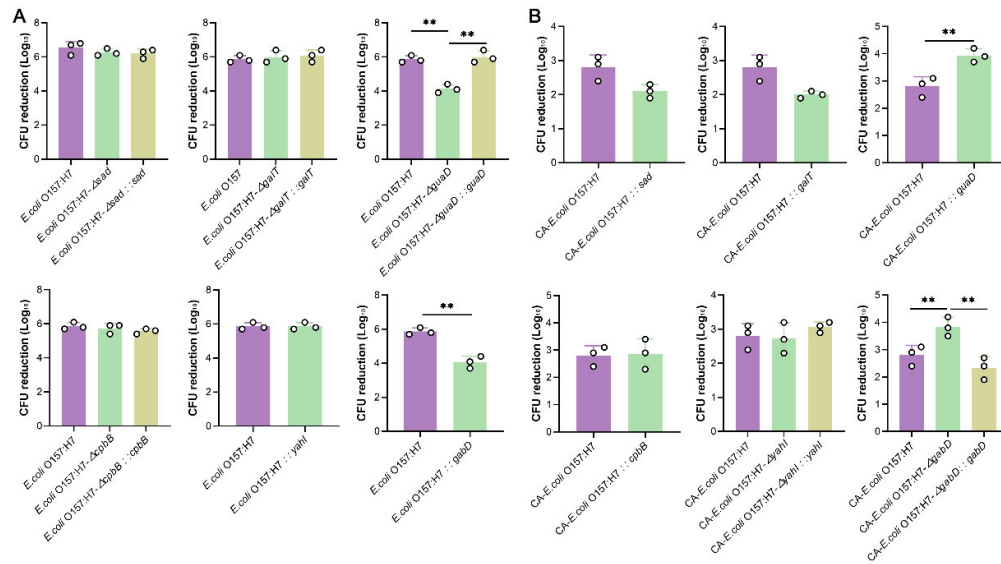

**Figure S4: Effects of *guaD* gene and *gabD* gene on antibiotic tolerance in *E. coli*.** A: Deletion and deletion-complemented of *guaD* gene and overexpression of *gabD* gene were constructed in *E. coli* O157:H7 strain. It was found that deletion of the *guaD* gene and overexpression of the *gabD* gene could improve antibiotic tolerance to some extent. B: Overexpression of the *guaD* gene, deletion and deletion-complemented of the *gabD* gene were constructed in CA-*E. coli* O157:H7 strain. It was also found that overexpression of the *guaD* gene and deletion of the *gabD* gene could restore the tolerance of the strain to ciprofloxacin to a certain extent. All data from biological experiments performed in triplicate are presented as means  $\pm$  SD. \*\* $P < 0.01$ .

**Table S4 Strains used in this study.**

| Strains                                                          | Source/Reference |
|------------------------------------------------------------------|------------------|
| <b>Gram-negative bacteria</b>                                    |                  |
| <i>E. coli</i> ATCC 25922                                        | ATCC             |
| <i>E. coli</i> O157:H7                                           | In this study    |
| <i>E. coli</i> B2 ( <i>mcr-1</i> + <i>bla</i> <sub>NDM-5</sub> ) | In this study    |
| <i>E. coli</i> O157:H7 $\Delta galT$                             | In this study    |
| <i>E. coli</i> O157:H7 $\Delta galT :: galT$                     | In this study    |
| <i>E. coli</i> O157:H7 $\Delta wcaN$                             | In this study    |
| <i>E. coli</i> O157:H7 $\Delta wcaN :: wcaN$                     | In this study    |
| <i>E. coli</i> O157:H7 $\Delta sad$                              | In this study    |
| <i>E. coli</i> O157:H7 $\Delta sad :: sad$                       | In this study    |
| <i>E. coli</i> O157:H7 $\Delta guaD$                             | In this study    |
| <i>E. coli</i> O157:H7 $\Delta guaD :: guaD$                     | In this study    |
| <i>E. coli</i> O157:H7 $\Delta cpbB$                             | In this study    |
| <i>E. coli</i> O157:H7 $\Delta cpbB :: cpbB$                     | In this study    |
| <i>E. coli</i> O157:H7 $:: yahl$                                 | In this study    |
| <i>E. coli</i> O157:H7 $:: gabD$                                 | In this study    |
| <b>Gram-positive bacteria</b>                                    |                  |
| <i>S. aureus</i> ATCC 29213                                      | ATCC             |
| MRSA T144                                                        | In this study    |

ATCC, American Type Culture Collection.



**Table S5 RT-qPCR primers used in this study.**

| Genes           | Sequence (5'→3')                                       | Product (bp) |
|-----------------|--------------------------------------------------------|--------------|
| <i>paoB</i>     | AAGGTGTTTTTCAGCGGTGGGATG<br>CTGGGCGGAGTAGCACATAAGC     | 122          |
| <i>yahI</i>     | CGGCATCGGCTATCTGATCCAAC<br>TCCACTTCCACCTGAGTCACCAC     | 96           |
| <i>wcaN</i>     | GCAGCCACAATCTCGTCAACAATG<br>GCAGTTATTCTGTAGCGGGTCTC    | 125          |
| <i>sad</i>      | ATTCAGCCAGCCATATACGCCTTG<br>TTCCCATCATTCTTGACAGGTAACGG | 128          |
| <i>galT</i>     | AGCTGCCAGTGTTGATTCTCTTCG<br>GACAACCTCTTCCAGTGCTCCTTC   | 86           |
| <i>cpdB</i>     | AGCACGAAACCACAGTCACTCATC<br>CCTGACGGTTGATCTTCGCT       | 102          |
| <i>guaD</i>     | TGCCTGGGTGAAATCGCTTTATCC<br>AGATGGACGCAGTGAGCAAAGAC    | 105          |
| <i>fixA</i>     | GTATGGTCGGCGGCGGATATTG<br>GCAAATGCGGCGATCTGTTCTTC      | 134          |
| <i>fixX</i>     | CAAGAAGCAGGATGACGGCAGTG<br>CGTAACGGAACCTCCACACCAAAGG   | 140          |
| <i>folA</i>     | TGACGCATATCGACGCAGAAGTG<br>CCGCCGCTCCAGAATCTCAAAG      | 143          |
| <i>polB</i>     | AGTTCACCCGCCATCAGTTTGTC<br>GCCCAGCAGTTTCAGCAGGAG       | 101          |
| <i>copA</i>     | TACGCTCCGCCAGGTTTACCC<br>ATGACGATGACAGCCAGCAGTTG       | 126          |
| <i>degP</i>     | CAACGGCGGCTGAGACTTCTTC<br>GCTGACCACTGAAGGCATCACC       | 92           |
| <i>rclA</i>     | TCAATGCCCATGTGGAGCGAATC<br>CTGGATGTAAACGAAGCGGTAGCC    | 132          |
| <i>csgA</i>     | CGGTGGTGGCGGTAATAATAGCG<br>GTCAAGTCAGAGTTACGGGCATCAG   | 111          |
| <i>ycdL</i>     | CACCGAAATGAAAGAAGCGATAGCG<br>GCCCCACGGAAAATCAGACTACG   | 81           |
| <i>aceF</i>     | AGAACGAAGAAGCGGCGAAACG<br>AGCGAACTATTGAAGCGAGGCATC     | 112          |
| <i>emrA</i>     | CGTGCGTCTTCCTCGGTAATGTAG<br>CACCTCTTCTATCGGCGTTGTCAC   | 117          |
| <i>16S rRNA</i> | AACTGGAGGAAGGTGGGGATGAC<br>CGGACTACGACGCACTTTATGAGG    | 135          |
